# Supplementary material for: A roadmap for the functional annotation of protein families: a community perspective
Source: Oxford University Press journal article supplement (doi:10.1093/database/baac062), 2022-01-01
Supplement: baac062_supp.zip [file baac062_supp.zip]

## **Day 1 (Feb 3 2022)**

9h-9h30 **Intro:** *Setting the stage and objectives* by Valérie de Crécy-Lagard and Iddo Friedberg

9h30-12h **Session 1:** *Capture of what is known, past and future.*

**Session co-chairs:** Chris Mungall & Ana Conesa

### **Speakers:**

9h30-9h40: Alan Bridge

9h40-9h50: Zhiyong Lu

9h50-10h00: Valerie Wood

10h00-10h10: Lucy Colwell

10h10-10h15: Elisha Wood-Charlson, Miro orientation

10h15-10h55 **Session1 Breakout Discussions**

### **Session1\_Q1 -**

What are major bottlenecks that face functional annotation resources to efficiently **collect** quality functional data? What actions could be proposed to address these bottlenecks?

### **Live Group 1 (Animator/Facilitator: Geoffrey Hutinet)**

John Gerlt

Ana Conesa

Raquel Dias

Yousong Ding

### **Remote Group 1 (Animator/Facilitator: Anne Morgat)**

Chris Henry

Gang Fang

Darren Natale

Francoise Thibaud-Nissen

Crysten Blaby-Haas

Chris Mungall

Cecilia Arighi

Iddo Friedberg

Alex Bateman

Valerie Wood

Katherine O'Toole

### **Session1\_Q2**

What are major bottlenecks that face functional annotation resources to accurately **describe** information on protein function? What actions could be proposed to address these bottlenecks?

**Live Group 2 (Animator/Facilitator: Anita de Ward)**

Valerie de Crecy-Lagard

Peter Uetz

Claire McWhite

Joshua Goldford

Richard Roberts

**Remote Group 2 (Animator/Facilitator: Barbara Cheifet)**

Adam Deutschbauer

Peter Weigle

Irina Rodionova

Gaurav D Moghe

Christine Orengo

Zhiyong Lu

Elisha Wood-Charlson

Maria-Jesus Martin

Christina MacLaughlin

David Vallenet

Alan James Bridge

**Session1 \_Q3**

What are major bottlenecks that face functional annotation resources to accurately **share/transfer** information on protein function? What actions could be proposed to address these bottlenecks?

**Live Group 3 (Animator/Facilitator: Seán O'Donoghue)**

Christian Dallago

Benjamin Gyori

Gloria Sheynkman

Jeffrey Rudolf

**Remote Group 3 (Animator/Facilitator: Stephen Burley)**

Predrag Radivojac

Dmitri Rodionov

Lucy J. Colwell

Bill Nelson

Ian Blaby

Aron Marchler-Bauer

Antoine Danchin

Peter Karp

Lana Saleh

10h55-11h15 Coffee Break

11h15-12h **Session 1 wrap-up discussion** led by co-chairs Chris Mungall & Ana Conesa

12h00-13h00 Lunch break

13h00-15h30 **Session 2:** *What is an isofunctional family?*

**Session co-chairs:** John Gerlt, Paul Thomas & Alex Bateman

**Speakers:**

13h00-13h10 Intro to session by Alex Bateman (2mn) **and** John Gerlt (8mn),

13h10-13h20 Christine Orengo

13h20-13h30 Paul Thomas

13h30-13h40 Maria Martin

**13h40-14h25 Session 2 Breakout Discussions**

**Session 2\_Q1**

What does it mean to be isofunctional? What constitutes adequate similarity in function to be isofunctional? Same reaction mechanism, same substrate specificity, same cellular pathways, same phenotypes, other?

**Live Group 1 (Animator/Facilitator: Yousong Ding)**

John Gerlt

Paul D. Thomas

Richard Roberts

Joshua Goldford

Raquel Dias

**Remote Group 1 (Animator/Facilitator: Peter Weigele)**

Chris Henry

Gang Fang

Lucy J. Colwell

Bill Nelson

Ian Blaby

Cecilia Arighi

Alex Bateman

Christina MacLaughlin

Antoine Danchin

Lana Saleh

**Session2\_Q2**

What methods/tools can we use/develop to identify and create isofunctional families?

**Live Group 2 (Animator/Facilitator: Jeffrey Rudolf)**

Valerie de Crecy-Lagard

Claire McWhite

Christian Dallago

Benjamin Gyor

Geoffrey Hutinet

**Remote Group 2 (Animator/Facilitator: Irina Rodionova)**

Adam Deutschbauer

Darren Natale

Anne Morgat

Gaurav D Moghe

Christine Orengo

Zhiyong Lu

Maria-Jesus Martin  
Iddo Friedberg  
Stephen Burley  
Peter Karp

### **Session2\_Q3**

How can different members of the community, both experimental and computational, collaborate on identifying and annotating isofunctional families, and make this information broadly available?

### **Live Group 3 (Animator/Facilitator: Peter Uetz)**

Ana Conesa  
Seán O'Donoghue  
Anita de Waard  
Gloria Sheynkman

### **Remote Group 3 (Animator/Facilitator: Aron Marchler-Bauer)**

Predrag Radivojac  
Dmitri Rodionov  
Francoise Thibaud-Nissen  
Alan James Bridge  
Crysten Blaby-Haas  
Chris Mungall  
Elisha Wood-Charlson  
Valerie Wood  
David Vallenet  
Barbara Cheifet  
Katherine O'Toole

14h25-14h45 **Break**

14h45-15h30h **Session 2 wrap-up discussion** led by co-chairs John Gerlt, Paul Thomas & Alex Bateman

15h30-15h45 **Coffee Break**

15h45-18h00 **Session 3: *Mapping and propagating functional data to isofunctional group (Inference)***

**Session co-chairs:** Chris Henry & Gaurav Moghe

### **Speakers:**

15h45-15h55 Gaurav Moghe  
15h55-16h05 Francoise Thibaud-Nissen  
16h05-16h15 Peter Karp  
16h15h-16h25 Christian Dallago

16h25-17h05 **Session 3 Breakout Discussions**

### **Session3\_Q1**

**How do we improve the accuracy of functional propagation? How do we evaluate accuracy?**

**Live Group 1 (Animator/Facilitator: Joshua Goldford)**

Valerie de Crecy-Lagard  
Richard Roberts  
Paul D. Thomas  
Christian Dallago  
Yousong Ding

**Remote Group 1 (Animator/Facilitator: Christine Orengo)**

Adam Deutschbauer  
Gang Fang  
Irina Rodionova  
Gaurav D Moghe  
Ian Blaby  
Cecilia Arighi  
Alex Bateman  
Christina MacLaughlin  
Peter Karp  
Antoine Danchin

**Session3\_Q2**

**How do we integrate, share, and credit functional information across resources?**

**Live Group 2 (Animator/Facilitator: Benjamin Gyori)**

John Gerlt  
Seán O'Donoghue  
Anita de Waard  
Jeffrey Rudolf  
Geoffrey Hutinet

**Remote Group 2 (Animator/Facilitator: Zhiyong Lu)**

Peter Weigele  
Darren Natale  
Francoise Thibaud-Nissen  
Alan James Bridge  
Bill Nelson  
Chris Mungall  
Elisha Wood-Charlson  
Iddo Friedberg  
Stephen Burley  
Lana Saleh

**Session3\_Q3**

**How can automated computer algorithms help (e.g. modeling, machine learning)?**

**Live Group 3 (Animator/Facilitator: Raquel Dias)**

Ana Conesa  
John Gerlt  
Claire McWhite

Gloria Sheynkman  
Peter Uetz

**Remote Group 3 (Animator/Facilitator: Dmitry Rodionov)**

Predrag Radivojac  
Lucy J. Colwell  
Anne Morgat  
Chris Henry  
Crysten Blaby-Haas  
Aron Marchler-Bauer  
Maria-Jesus Martin  
Valerie Wood  
David Vallenet  
Barbara Cheifet  
Katherine O'Toole

17h05-17h20 **Break**

17h20-18h00 **Session 3 wrap-up discussion** led by co-chairs Chris Henry & Gaurav Moghe

**18h30 Dinner with talk EVENING SPEAKER at 19h00** : Dr Drew Berry

**Day 2 Feb4 2022**

8h30 -10h45 **Session 4:** *Building a new data-driven biological culture: challenges in training and culture changes to create data that is FAIR and machine readable.*

**Session co-chairs:** Elisha Wood-Charlson & Ian Blaby

**Speakers:**

8h30-8h40 Elisha Wood-Charlson  
8h40-8h50 Geoffrey Hutinet  
8h50-9h00 Steven Burley  
9h00-9h10 Benjamin Gyori

9h10-09h50 **Session 4 Breakout Discussions**

**Session4\_Q1**

**What are the current challenges impeding data discovery and access from either online resources or the published literature?**

**Live Group 1 (Animator/Facilitator: Gloria Sheynkman)**

Peter Uetz  
Benjamin Gyori  
Raquel Dias  
Jeffrey Rudolf  
Geoffrey Hutinet

**Remote Group 1 (Animator/Facilitator: Predrag Radivojac)**

Peter Weigele  
Irina Rodionova  
Alan James Bridge  
Gaurav D Moghe  
Bill Nelson  
Zhiyong Lu  
Elisha Wood-Charlson  
Lana Saleh  
Christina MacLaughlin  
Antoine Danchin

**Session4\_Q2 -**

**How can annotation data be made more machine-readable?**

**Live Group 2 (Animator/Facilitator: Ana Conesa)**

John Gerlt  
Claire McWhite  
Paul D. Thomas  
Joshua Goldford  
Richard Roberts

**Remote Group 2 (Animator/Facilitator: Adam Deustchbauer)**

Chris Henry  
Dmitri Rodionov  
Darren Natale  
Francoise Thibaud-Nissen  
Crysten Blaby-Haas  
Chris Mungall  
Maria-Jesus Martin  
Alex Bateman  
Stephen Burley  
Peter Karp

**Session4\_Q3**

**How can annotation data be made more approachable and accessible to all users, and how can users trust the veracity of deposited data?**

**Live Group 3 (Animator/Facilitator: Christian Dallago)**

Valerie de Crecy-Lagard  
John Gerlt  
Seán O'Donoghue  
Anita de Waard  
Yousong Ding

**Remote Group 3 (Animator/Facilitator: Valerie Wood)**

Gang Fang  
Lucy J. Colwell  
Anne Morgat  
Christine Orengo

Ian Blaby  
Aron Marchler-Bauer  
Cecilia Arighi  
Iddo Friedberg  
David Vallenet  
Barbara Cheifet  
Katherine O'Toole

09h50-10h05 **Break**

10h05-10h45 **Session 4 wrap-up discussion** led by co-chairs Elisha Wood-Charlson & Ian Blaby

10h45-11h00 **Break**

11h00-13h00 **Session 5:** *Automation of functional data generation: challenges in designing, conducting and capturing high-throughput functional screening assays to increase functional knowledge at the pace of the potential of computational methods to process and propagate this knowledge.*

**Session co-chairs:** Adam Deutschbauer & Iddo Friedberg

**Speakers:**

11h00-11h10 Crysten Blaby-Haas  
11h10-11h20 Irina Rodionova  
11h20-11h30 Gloria Sheynkman  
11h30-11h40 Peter Uetz

11h40-12h15 **Session 5 Breakout Discussions**

**Session5\_Q1**

What's the value and best usage of high-throughput "functional" data (beyond just sequence data) for functional annotation of proteins?

**Live Group 1 (Animator/Facilitator: Claire McWhite)**

John Gerlt  
Paul D. Thomas  
Benjamin Gyori  
Jeffrey Rudolf

**Remote Group 1 (Animator/Facilitator: Francoise Thibaud-Nissen)**

Adam Deutschbauer  
Peter Weigele  
Anne Morgat  
Gaurav D Moghe  
Christine Orengo  
Cristen Blaby-Haas  
Aron Marchler-Bauer  
Maria-Jesus Martin  
Christina MacLaughlin  
Barbara Cheifet



### **Session5\_Q2**

What data types are most critical, and can these data be generated at scale for diverse organisms/protein families?

#### **Live Group 2 (Animator/Facilitator: Joshua Goldford)**

Valerie de Crecy-Lagard  
Seán O'Donoghue  
Richard Roberts  
Raquel Dias

#### **Remote Group 2 (Animator/Facilitator: Bill Nelson)**

Chris Henry  
Gang Fang  
Darren Natale  
Francoise Thibaud-Nissen  
Irina Rodionova  
Ian Blaby  
Chris Mungall  
Cecilia Arighi  
Iddo Friedberg  
David Vallenet  
Katherine O'Toole

### **Session5\_Q3**

How can data from HT experiments be incorporated into annotations within established databases?

#### **Live Group 3 (Animator/Facilitator: Christian Dallago)**

Ana Conesa  
Anita de Waard  
Gloria Sheynkman  
Yousong Ding  
Geoffrey Hutinet

#### **Remote Group 3 (Animator/Facilitator: Peter Karp)**

Predrag Radivojac  
Dmitri Rodionov  
Lucy J. Colwell  
Alan James Bridge  
Bill Nelson  
Zhiyong Lu  
Elisha Wood-Charlson  
Valerie Wood  
Alex Bateman  
Stephen Burley  
Lana Saleh

12h15-12h30 **Break**

12h30-13h00 **Session 5 wrap-up discussion** led by co-chairs Adam Deutschbauer & Iddo Friedberg

13h00-14h30 **Session 6 with lunch** *Synthesis, creating the roadmap for efficient and accurate functional annotation of the global proteome.* (talks 35 mn, discussion 40 mn, closing 15mn by Valérie de Crécy-Lagard)

**Session co-chairs:** Sean O'Donoghue & Valérie de Crécy-Lagard

**Speakers :**

13h00-13h15 Sean O'Donoghue

13h15-13h25 Chris Mungall

13h25-13h35 Rich Roberts

13h35-14h20 **Session 6 whole group discussion** led by Rich Roberts & Chris Mungall

**Session6\_Q1**

How can communication and collaboration between the biocurators and experimentalist communities be improved?

**Session6\_Q2**

What funding mechanisms and incentives could be used to move the field forward?

14h20-14h30 Closing meeting **Valérie de Crécy-Lagard**
